# Supplementary material
Source: Springer Nature journal article supplement (https://www.springermedizin.de/resource/supplementary/12885_2008_1493_MOESM5_ESM.pdf/9472152)

|                  |   |   |         |     |   |   |         |     |
|------------------|---|---|---------|-----|---|---|---------|-----|
| LEF-1            | - | + | +       | +   | - | + | +       | +   |
| $\beta$ -catenin | - | + | +       | +   | - | + | +       | +   |
| Repressor        | - | - | Groucho | AES | - | - | Groucho | AES |

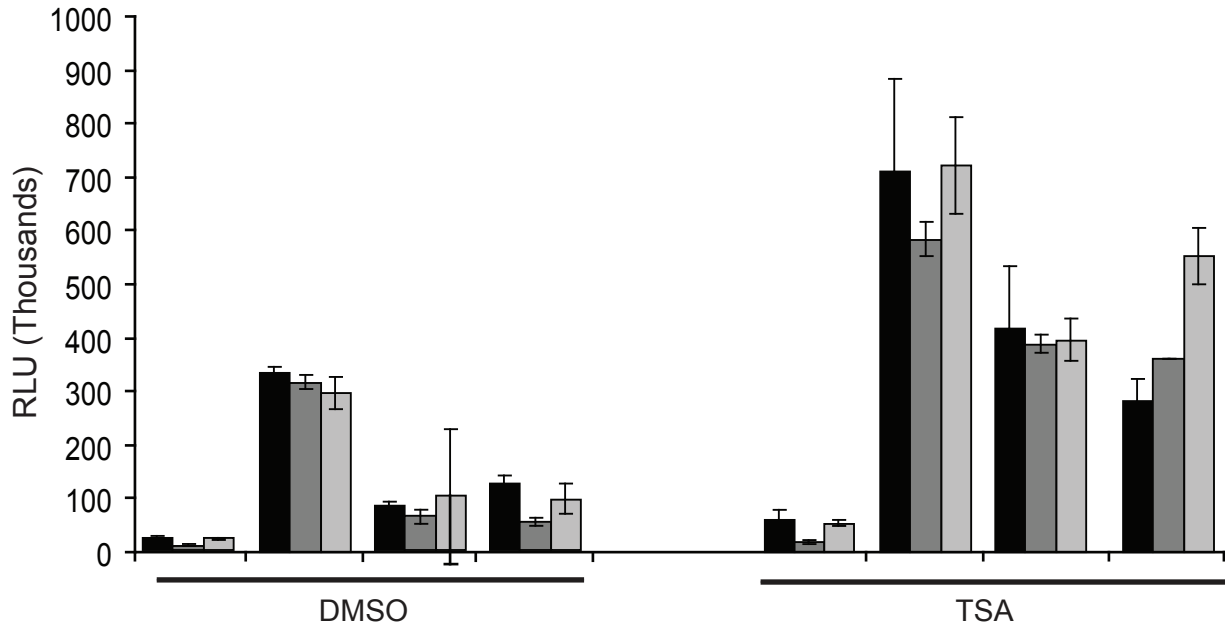

Supplement: MOESM5 [file 9472152]
